# Supplementary material for: CesA6 and PGIP2 Endocytosis Involves Different Subpopulations of TGN-Related Endosomes
Source: PubMed Central journal article supplement (PMC7118220; doi:10.3389/fpls.2020.00350), 2020-03-27
Supplement: Data_Sheet_1.pdf [file Data_Sheet_1.pdf]

**Supplementary Table 1. Primers used for secGFP-CesA6 construction**

| <b>secGFP-CesA6 constuction</b> |                          |
|---------------------------------|--------------------------|
| Name                            | Sequences (5'-3')        |
| CesA6for                        | AGGAGTCGACACCATGAACACC   |
| CesA6rev                        | GCTCACAACTGCAGTCGACGGCCC |

  

| <b>secGFP-CesA6 construction</b> |                                 |
|----------------------------------|---------------------------------|
| Name                             | Sequences (5'-3')               |
| pCesA6-XhoI                      | CCCCTCGAGAAAATCAACAAGCAAATAC    |
| pCesA6-BamHI                     | GCGGATCCATTTGTCTGAAAACAGACACAGC |

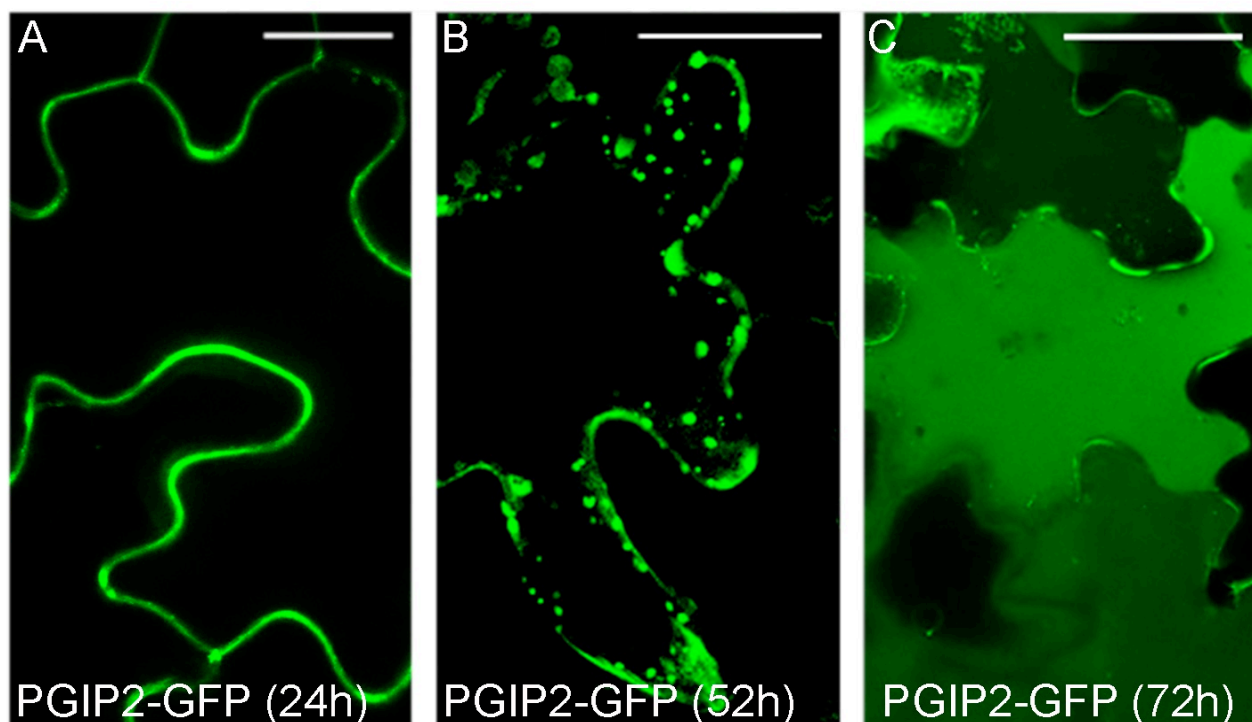

**D**

| Observation time | Cell Wall (%) | Endosomes (%) | Vacuole (%) |
|------------------|---------------|---------------|-------------|
| 24h              | 93±5          | 7±5           | 0           |
| 52h              | 52±8          | 48±8          | 0           |
| 72h              | 5±3           | 23±15         | 72±17       |

**Supplementary Figure 1.** Subcellular localization of PGIP2-GFP transiently expressed in the epidermis of tobacco leaves after agro-infiltration. At 24 hours after infiltration, PGIP2-GFP labeled the cell wall (A), at 52 hours after infiltration the fluorescent protein is internalized in endosomes (B). After 72 h of PGIP2-GFP expression, it is visible in the large central vacuole and little or nothing in the cell wall (C).

Scale bars: 20  $\mu$ m.

(D) Percentage quantification of PGIP2-GFP pattern maturation over time. Definition of classes: Cell Wall was indicated when continuous labeling of cell periphery was observed; Endosomes were indicated when internal compartments and discontinuous labeling of periphery was observed; Vacuole was indicated when central vacuole fluorescent intensity was above 20% of peripheral fluorescence.

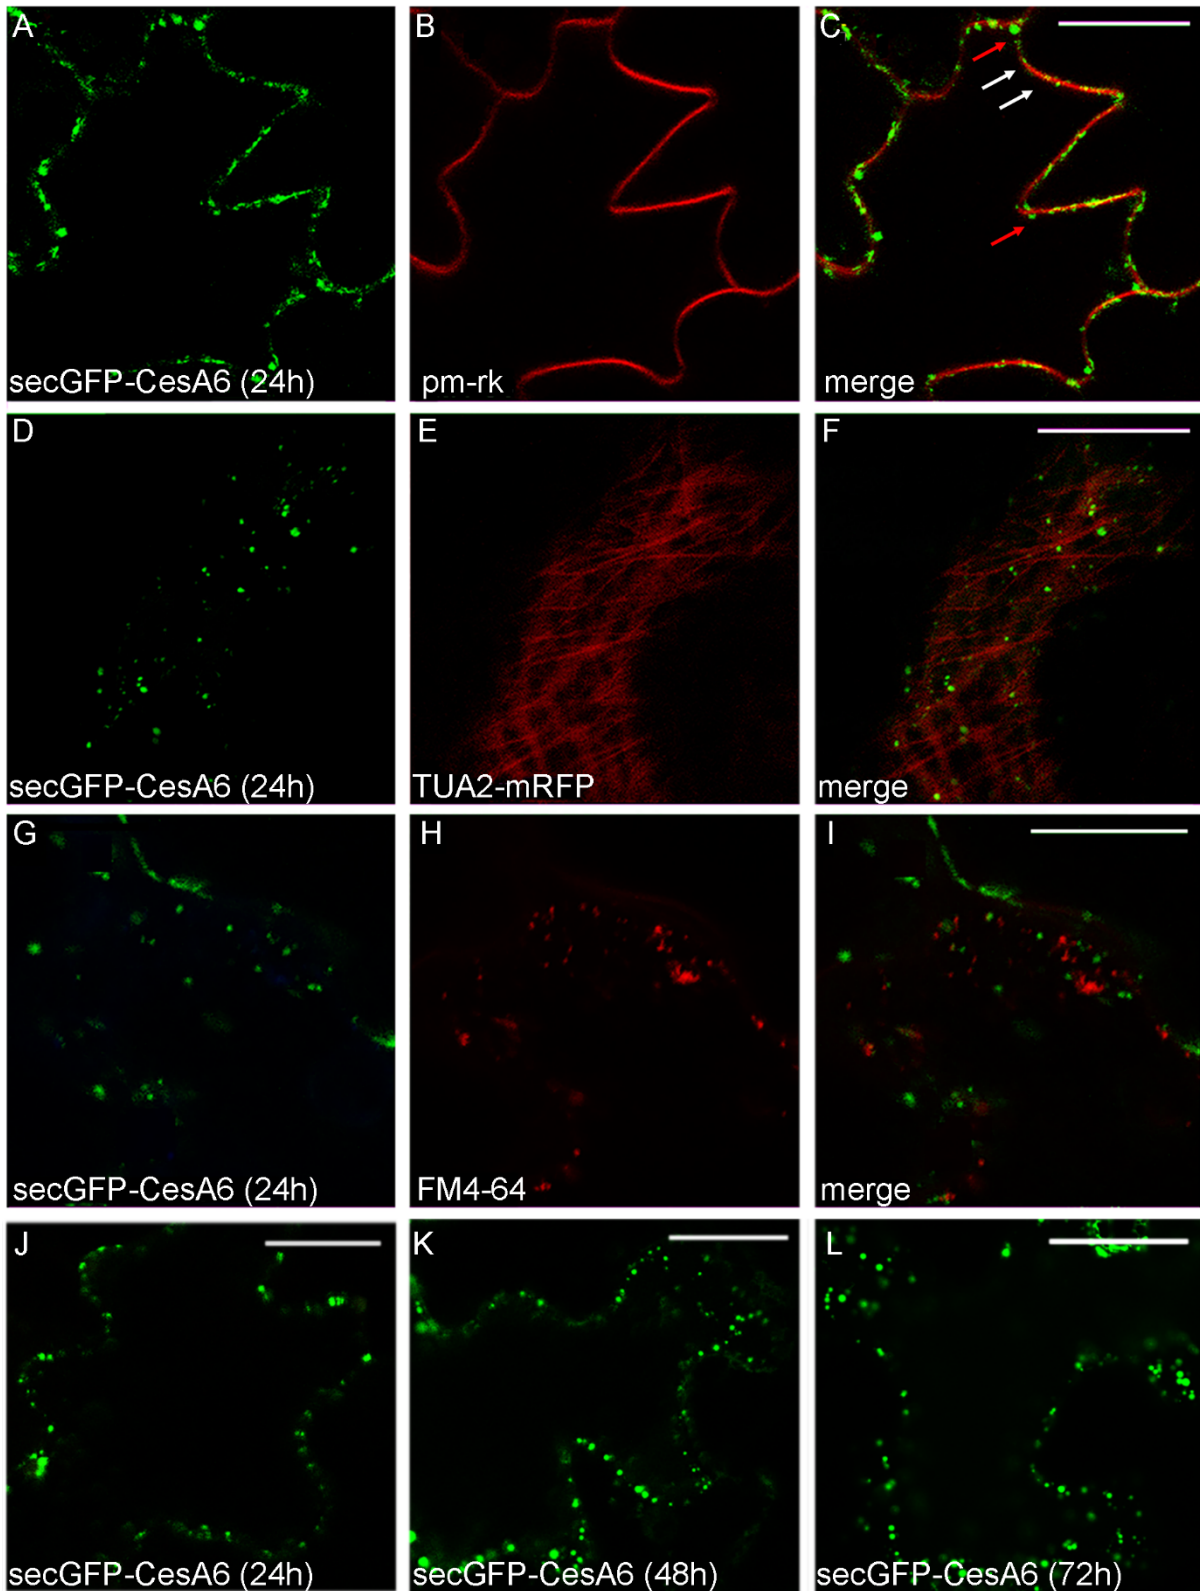

**Supplementary Figure 2.** Confocal images of tobacco epidermal cells transformed with secGFP-CesA6 (A) and pm-rk, plasma membrane marker (B). In merged image (C), secGFP-CesA6 is localized at the plasma membrane, labeled in red, with a patchy distribution (white arrows) and in intracellular compartments of different sizes (red arrows). Epidermal cells co-transformed with secGFP-CesA6 (D) and the microtubule fluorescent marker TUA2-mRFP (E) show the close association of MASCs with the microtubules (F). The intracellular compartments labeled by secGFP-CesA6 (G) and those labeled by FM4-64 (H) do not co-localize (I). secGFP-CesA6 fluorescent pattern did not change over time (J-L). Scale bars: 20  $\mu$ m.

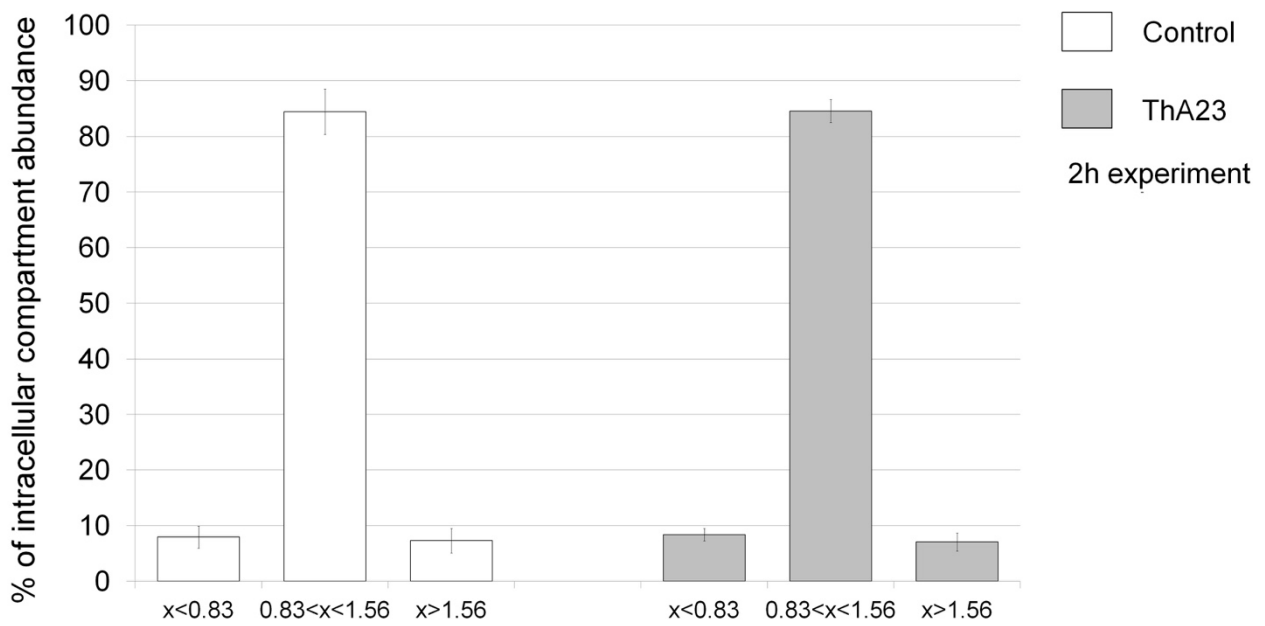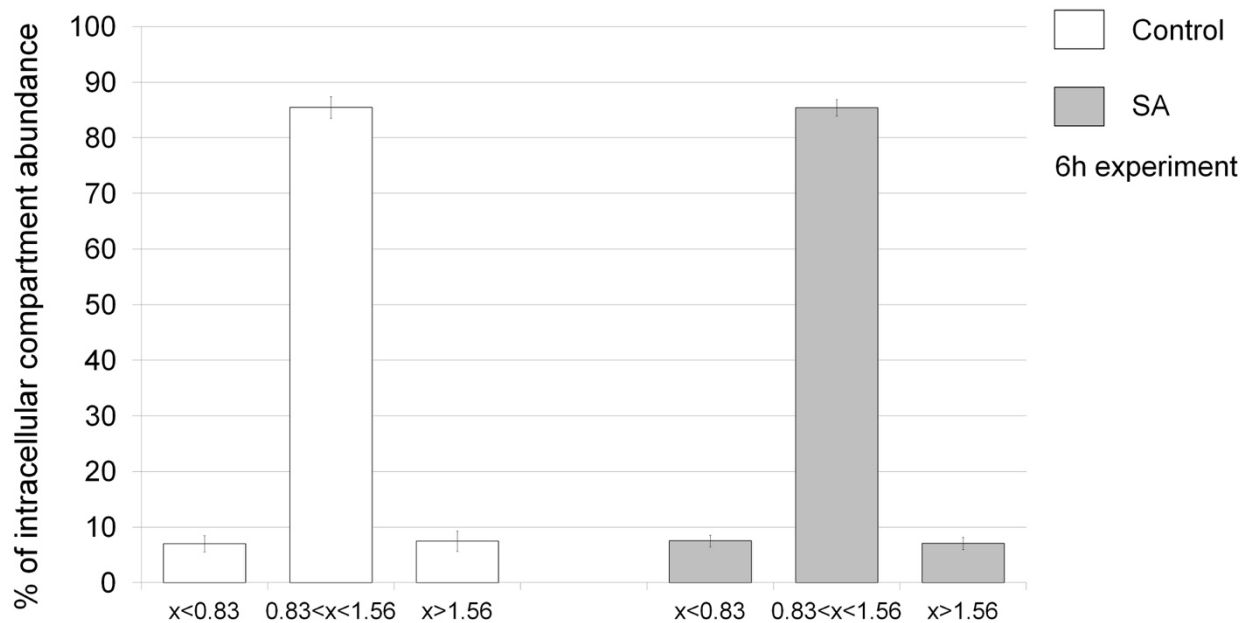

**Supplementary Figure 3.** Percentage distribution of secGFP-CesA6 labeled compartments classified by size with and without TyrA23 (350  $\mu\text{M}$ ) and SA ( $\mu\text{M}$ ). Three classes of compartments were considered: with dimensions less than 0.83  $\mu\text{m}$ , between 0.83 and 1.56  $\mu\text{m}$  and above 1.56  $\mu\text{m}$ .  $P > 0.353$  for variance significance (one-way ANOVA) between control and corresponding treatments.  $n = 12$  confocal section from 3 independent experiments. Error bars represent SD.

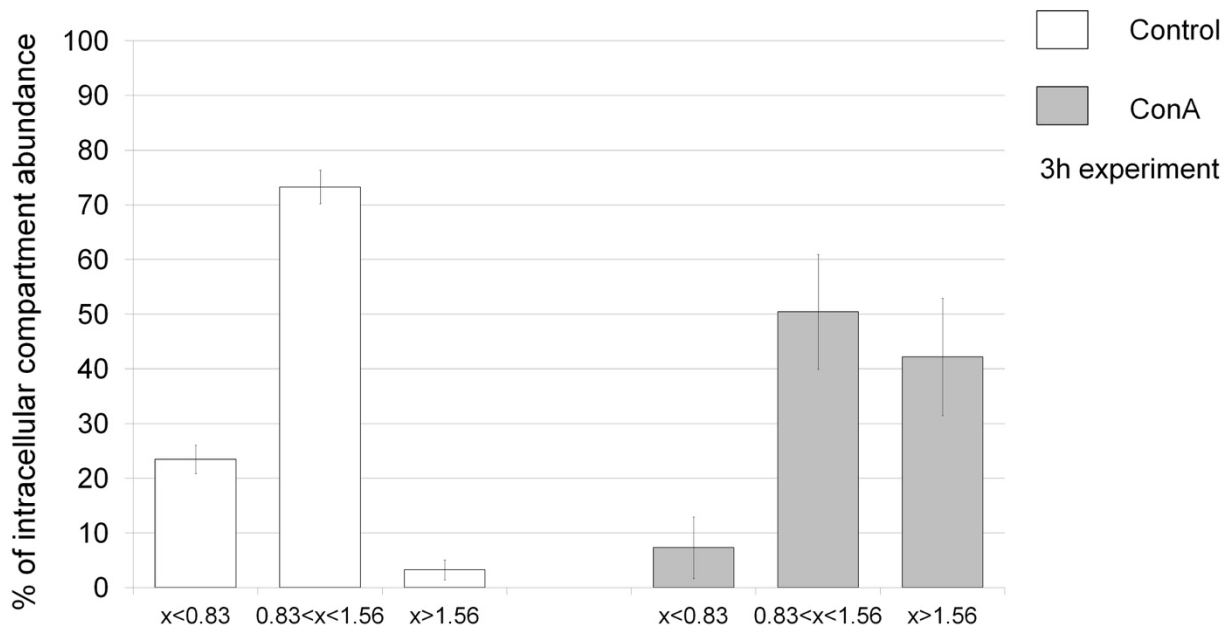

**Supplementary Figure 4.** Percentage distribution of PGIP2-GFP labeled compartments classified by size with and without ConA ( $2 \mu\text{M}$ ). Three classes of compartments were considered: with dimensions less than  $0.83 \mu\text{m}$ , between  $0.83$  and  $1.56 \mu\text{m}$  and above  $1.56 \mu\text{m}$ . Treatment with ConA (3h) induced significant effects, in fact there is a statistically significant difference between the input groups ( $P < 0.001$ ).  $n=12$  confocal section from 3 independent experiments. Error bars represent SD.

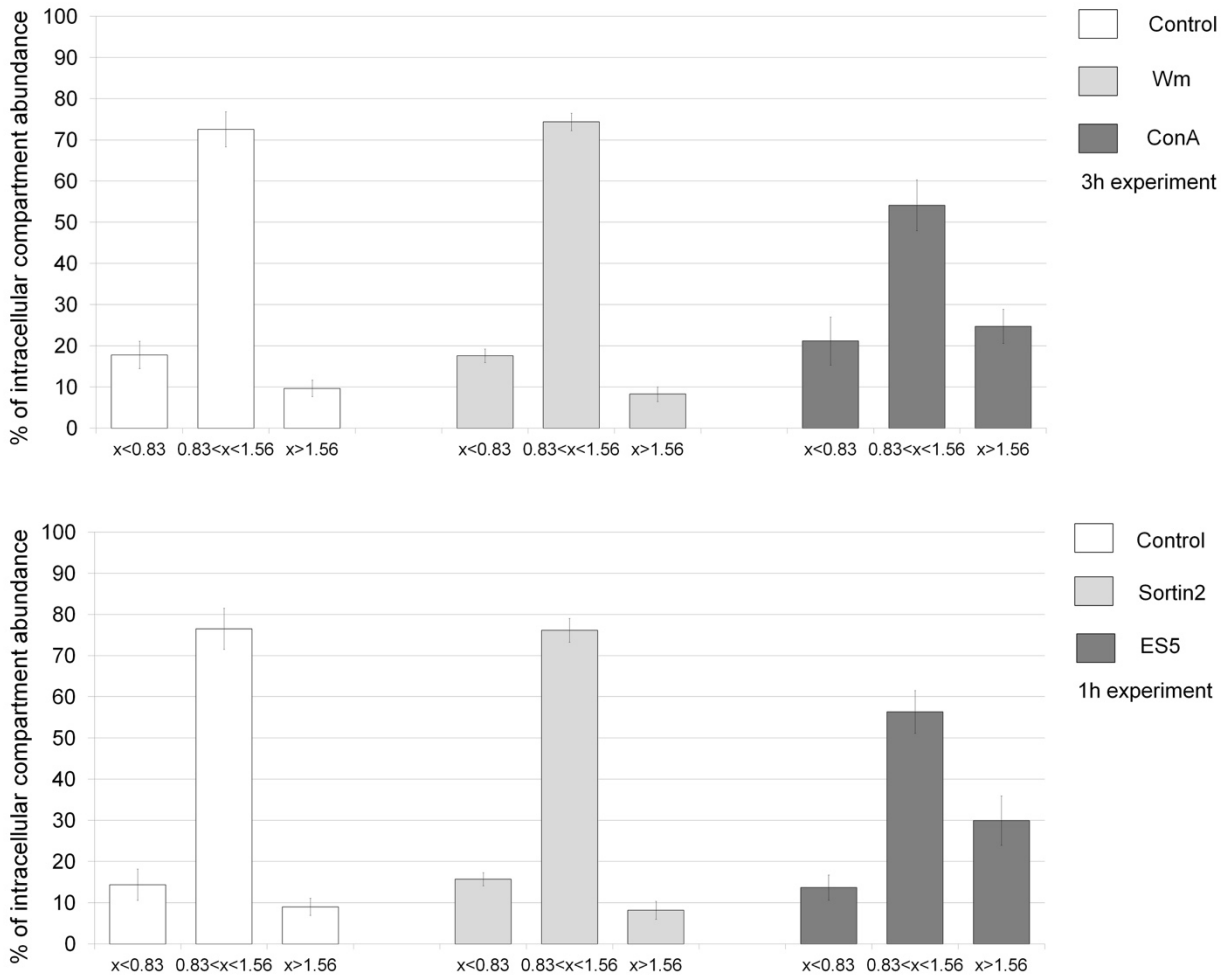

**Supplementary Figure 5.** Percentage distribution of secGFP-CesA6 labeled compartments classified by size with and without Wm (3  $\mu$ M), ConA (2  $\mu$ M), Sortin 2 (20  $\mu$ M) and ES5 (50  $\mu$ M). Three classes of compartments were considered: with dimensions less than 0.83  $\mu$ m, between 0.83 and 1.56  $\mu$ m and above 1.56  $\mu$ m.

Treatment with Wm (3h) or Sortin 2 (1h) did not induce significant effects.  $P > 0.082$  for variance significance (one-way ANOVA) between control and corresponding treatments. Treatment with ConA (3h) or ES5 (1h) induced significant effects ( $P < 0.001$ ).  $n = 12$  confocal section from 3 independent experiments. Error bars represent SD.

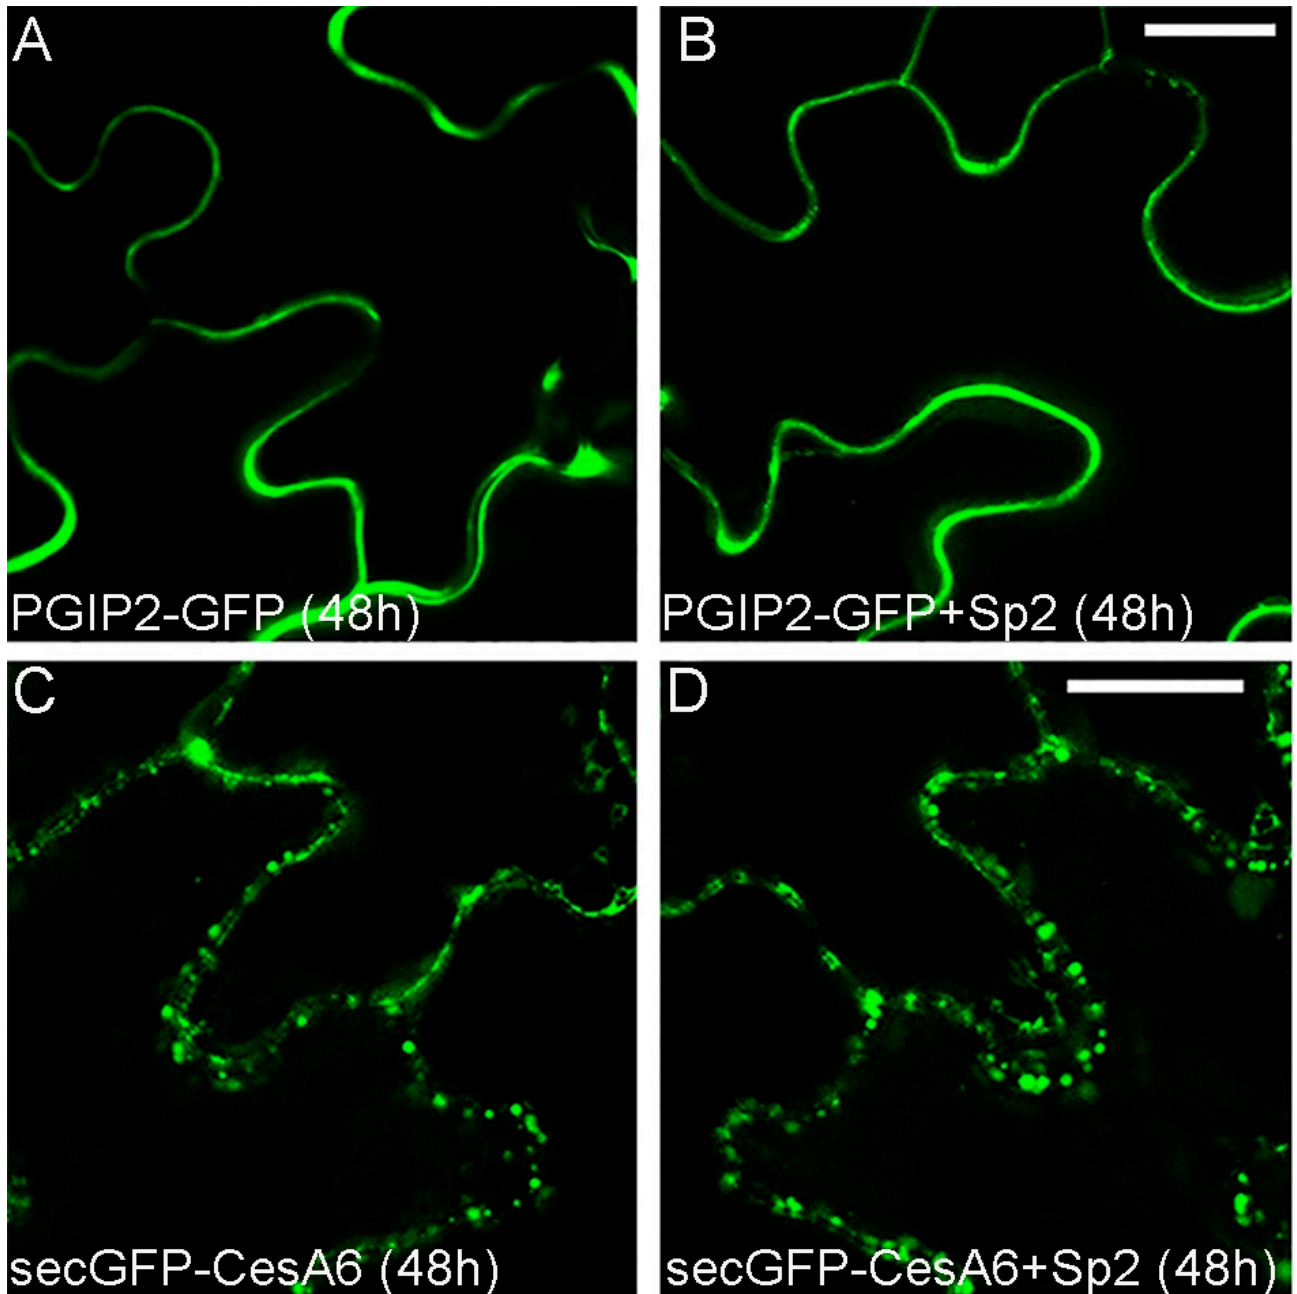

**Supplementary Figure 6.** Confocal images of epidermal leaves of Sp2 tobacco plants, transformed with PGIP2-GFP and secGFP-CesA6 without (A, C) and with (B, D) dexamethasone-induced Sp2 expression. Scale bars: 20  $\mu$ m
